# Supplementary material for: An ab initio study of sensing applications of MoB2 monolayer: a potential gas sensor
Source: Royal Society of Chemistry journal article supplement (doi:10.1039/c8cp07038e), 2019-01-01
Supplement: c8cp07038e1.pdf [file c8cp07038e1.pdf]

## Supplementary Information

### “An Ab-initio Study of Sensing Applications of MoB<sub>2</sub> Monolayer: A Potential Gas Sensor.”

a) S-up

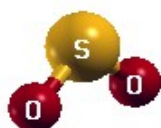

b) S-down

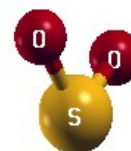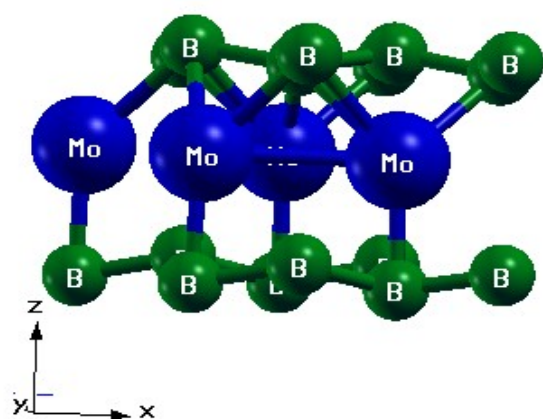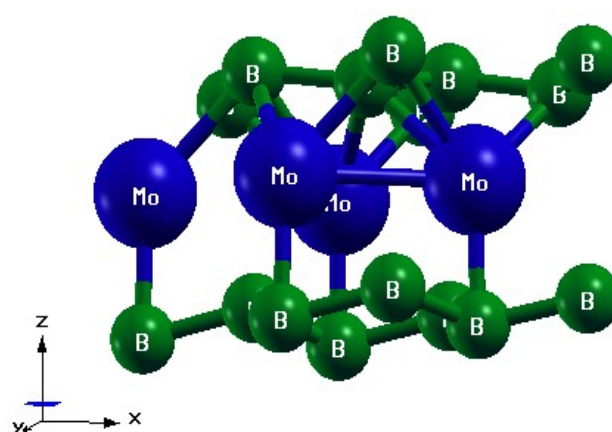

**Supplementary Figure 1:** SO<sub>2</sub> gas molecule placed over MoB<sub>2</sub> monolayer showing a) S-up and b) S-down configuration.

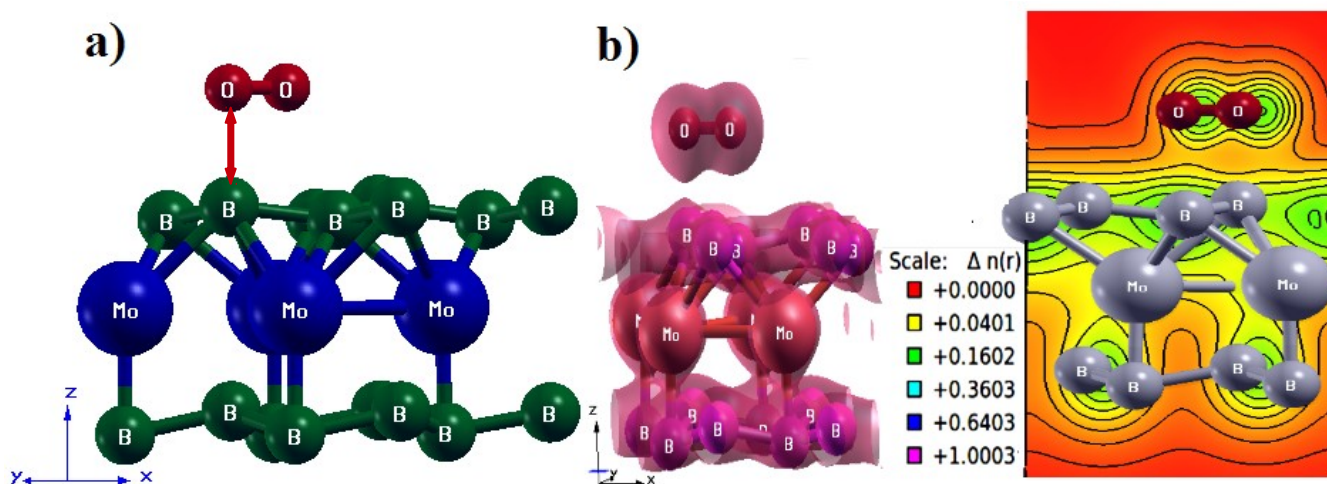

**Supplementary Figure 2:** a) O<sub>2</sub> gas molecule placed over MoB<sub>2</sub> monolayer; [Note- Red double sided arrow indicates the interfacial distance  $d_{eq} \sim 2.0 \text{ \AA}$ ] and b) Charge dispersion schematics for O<sub>2</sub> gas molecule over MoB<sub>2</sub> monolayer.

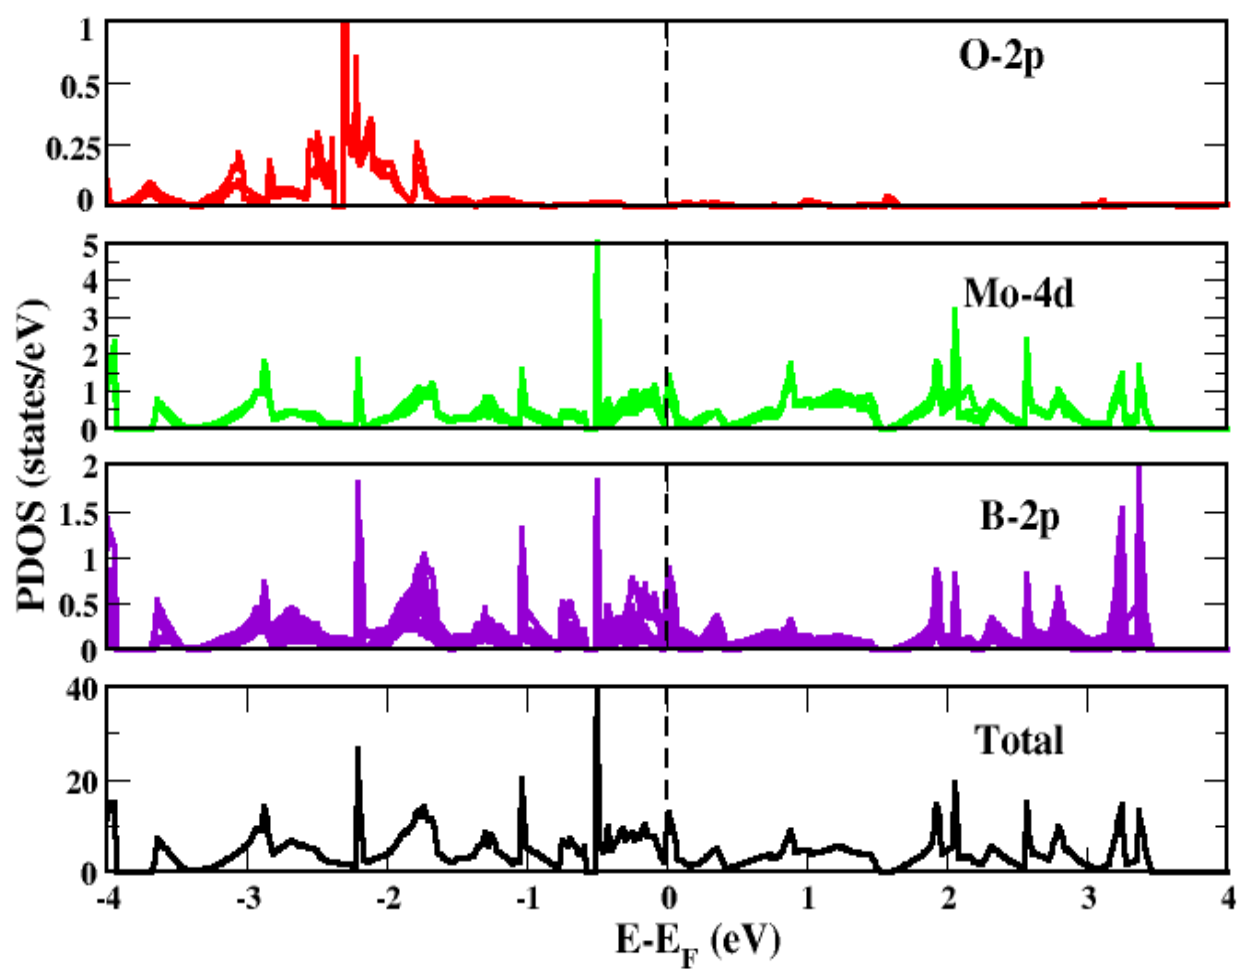

**Supplementary Figure 3:** Partial Density of States (PDOS) of O<sub>2</sub> gas molecule over MoB<sub>2</sub> Monolayer

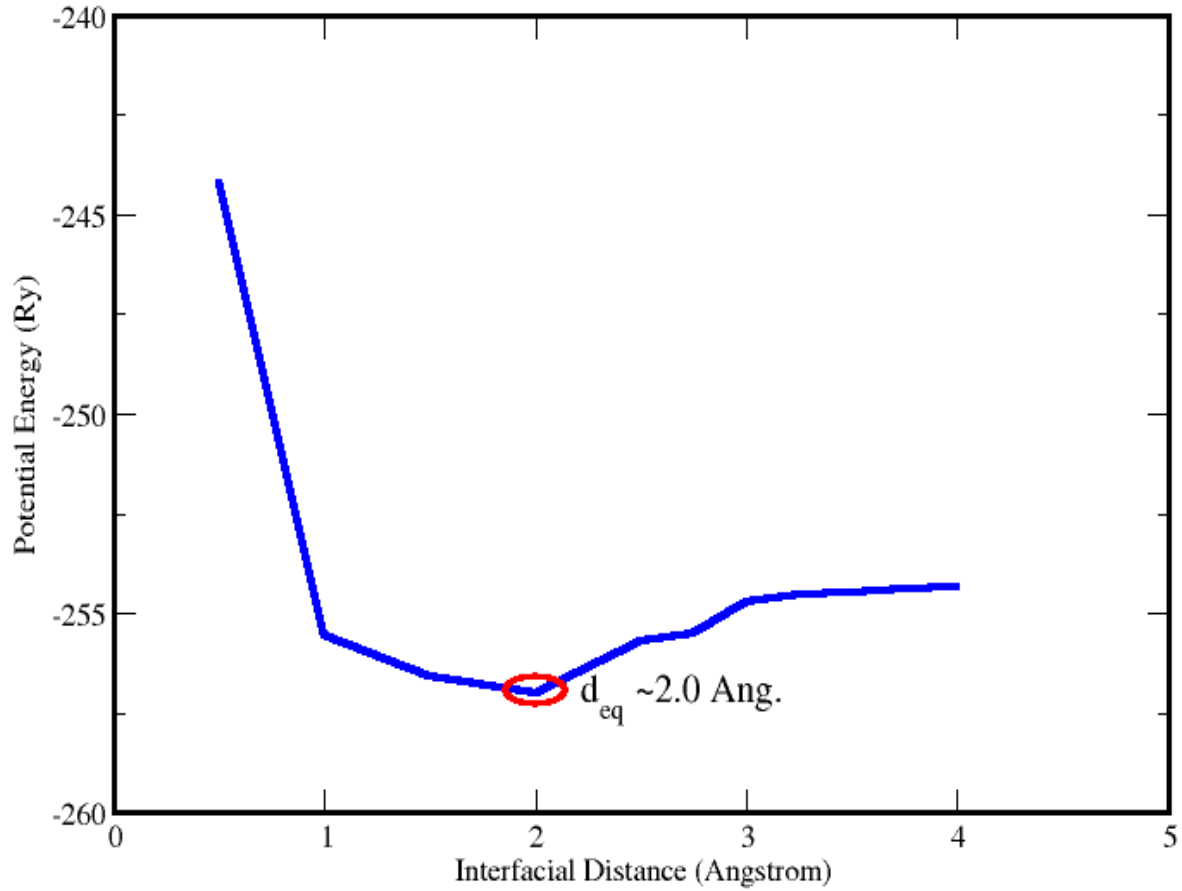

**Supplementary Figure 4:** Adsorption curve of O<sub>2</sub> adsorbed Monolayer showing physisorption nature.

**Description:** It can be seen from Figure 2(a) that there exists no interfacial bonding between the O<sub>2</sub> gas molecule and MoB<sub>2</sub> monolayer. This suggests that the nature of adsorption among the two species could be physisorption like in case of SO<sub>2</sub> adsorbed MoB<sub>2</sub> system. The charge sharing mechanism can also be seen from Figure 2(b) which confirms the presence of physisorption as there appears no electron flow between the MoB<sub>2</sub> monolayer and O<sub>2</sub> gas molecule. The existence of physisorption can also be justified by analysing the electronic structure of O<sub>2</sub> adsorbed MoB<sub>2</sub> monolayer. The partial density of states (PDOS) of the system is given in Figure 3 which clearly depicts that O-2p states are present in the valence band region and not participating in the metallic nature of the system. Only Mo-4d and B-2p states are actively participating in the metallic character of the material. In order to verify the physisorption nature we have also studied the adsorption curve given in Figure 4 which is following the similar trend like SO<sub>2</sub> adsorption curve (Fig 9 in main text). The minimum energy here is obtained at  $d_{eq} \sim 2.0 \text{ \AA}$ . Likewise SO<sub>2</sub> gas molecule, MoB<sub>2</sub> monolayer did not well detect the O<sub>2</sub> gas molecule. Hence we can claim that MoB<sub>2</sub> monolayer proves to be a good candidate for the sensing application particularly for NO<sub>2</sub> gas only.

**a)**

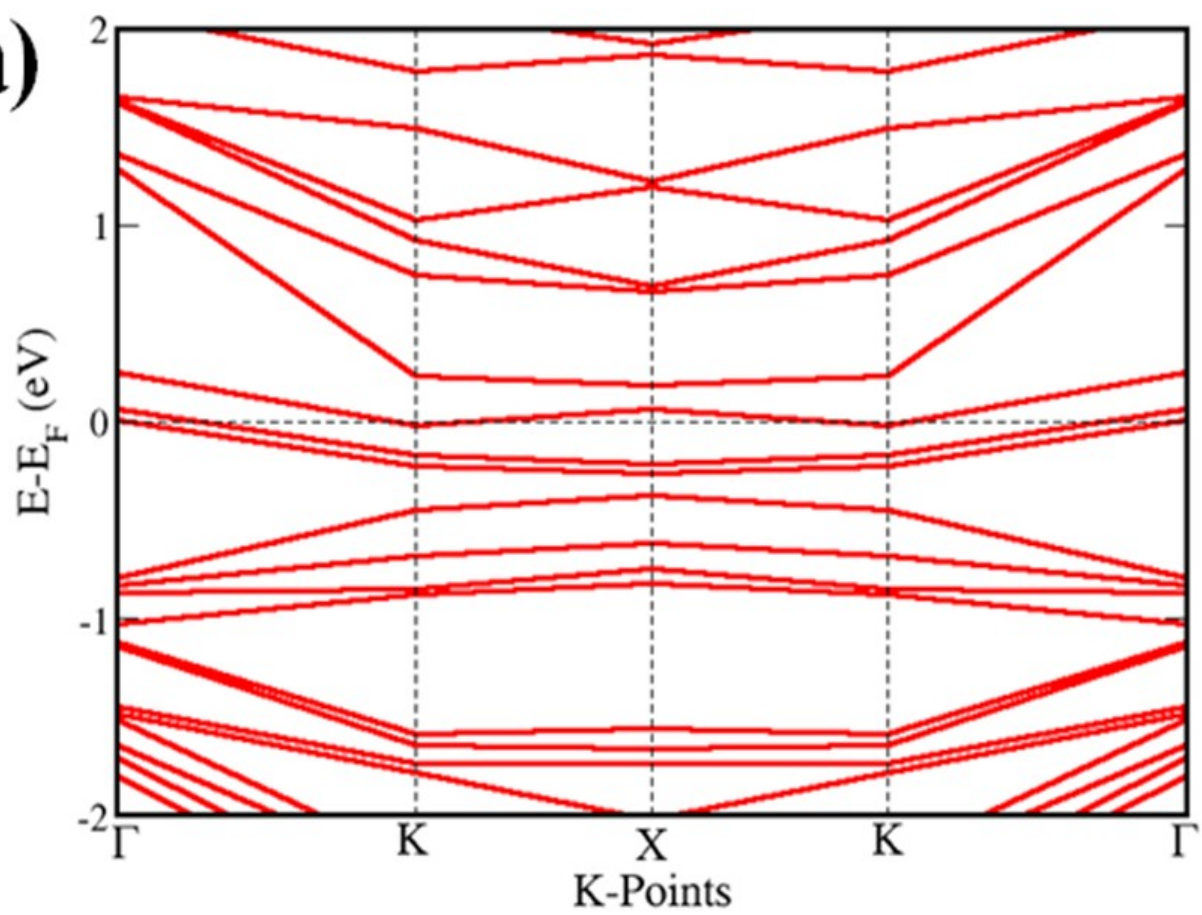

b)

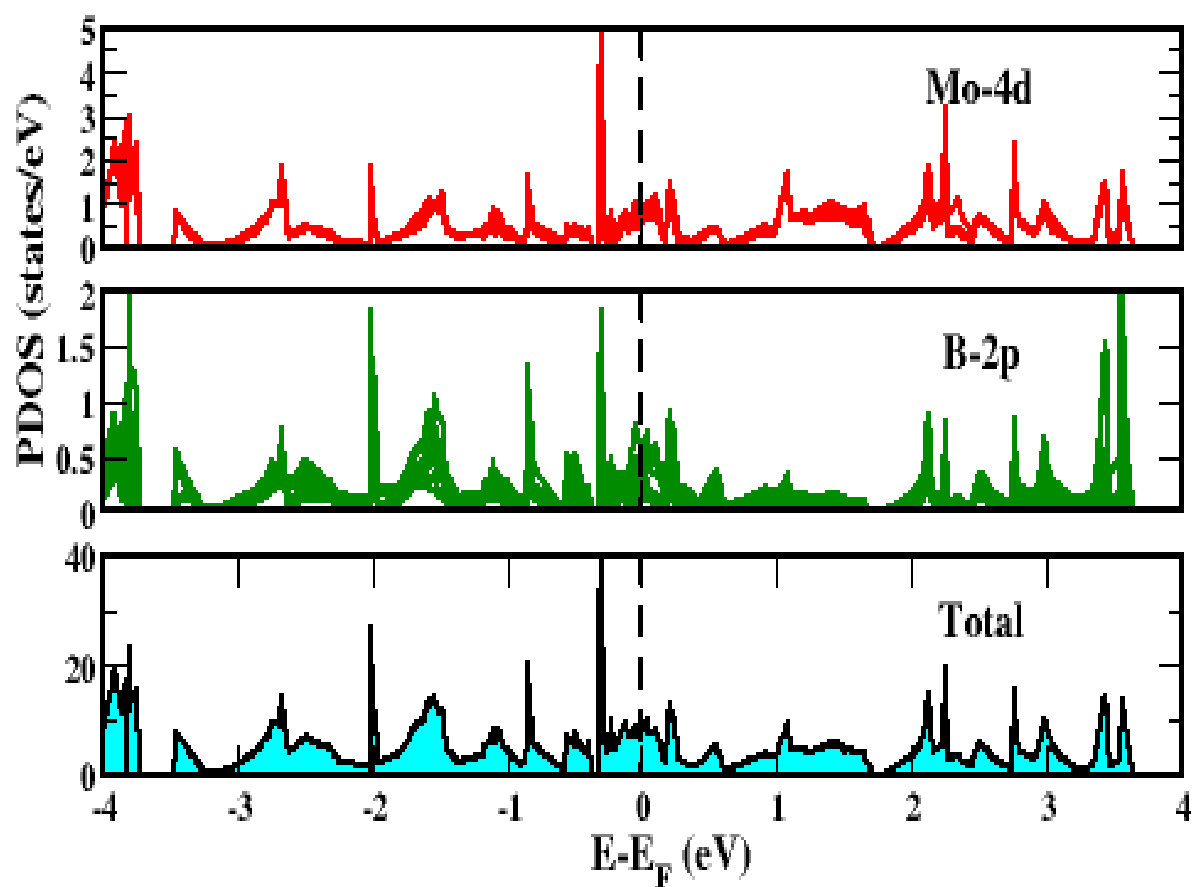

**Supplementary Figure 5: a) Energy Band, and b) Partial Density of States (PDOS) of pristine MoB<sub>2</sub> Monolayer**
